# Supplementary material for: Human AATF/Che-1 forms a nucleolar protein complex with NGDN and NOL10 required for 40S ribosomal subunit synthesis
Source: PubMed Central journal article supplement — Nucleic Acids Res. 2016 Sep 5;44(20):9803–20. doi: 10.1093/nar/gkw790 (PMC5175352; doi:10.1093/nar/gkw790), 2016-09-05
Supplement: supp_gkw790_nar-01167-x-2016-File010.pdf [file supp_gkw790_nar-01167-x-2016-File010.pdf]

## SUPPLEMENTARY DATA

### Supplementary Figure 1

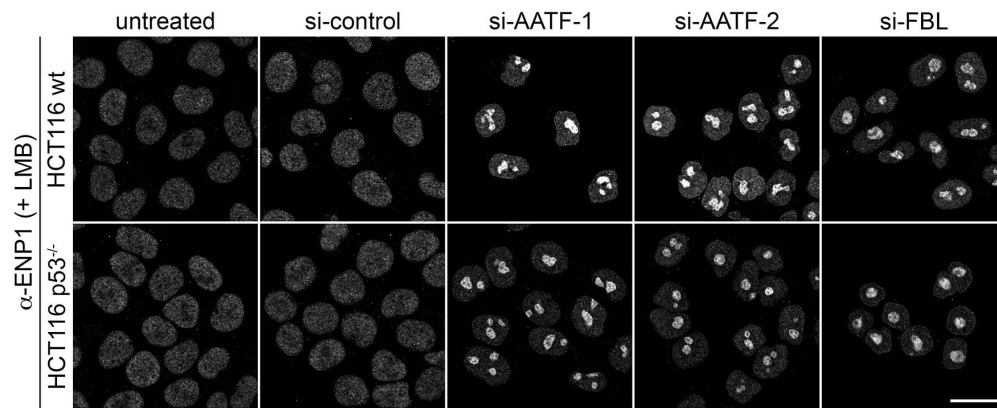

**Figure S1: The function of AATF in ribosome synthesis is independent of p53.** AATF and FBL RNAi was performed in HCT116 wt and p53<sup>-/-</sup> cell lines for 72 h. Localization of ENP1 was visualized by IF after LMB treatment (2 h, 20 nM). Scale bar, 20  $\mu$ m.

## Supplementary Figure 2

```

Hs AATF 1 .....MAGPQPLALQLEQLLNPRPSE.ADPEADP.....EEATAARVIDRFD...EGEDGEGLVVG..SIRKLAS
Mm TRB 1 .....MAAPQPLALQLEQLLNPRPRE.ADPEADP.....EEATRARVIDRFD...EGEEKDD.LAVS..SIRKLAP
Xt AATF 1 .....MAASLSQELANLLNPQPKF.RDPEDDQ.....DEATVARVIDRFE...EDGNEDDPMV..SQLRRTS
Dr AATF 1 .....MAASISQLEDLLNPLPHF.VDPEDDQ.....DEDTKAKVIEKFD...EGGDENDELLPG..HLRKRSG
Ce AATF 1 .....MGLLDDISKLTTPATEL.PDLEDDN.....FE.....DSQSALKSLKSTGNRQKAA
Dm AATF 1 MLRKSQKQPQVAVKSKLLAHPNESDSAEDSD.....DVATGPRLVDFEE..EYDLPDA...RST..DFRKRNV
At AATF 1 .....MAGGSKRKRAR.....LDSEED.....ISDQENLKAESDNEDD.....QLP
Sc Bfr2 1 .....MEKSLADQISDIAIKPVNKDFIDEENASLFQHNEKNGESDLSYGN.SNTEETKKAHYLEVE..KSKLRAE

```

```

Hs AATF 62 ASLLDTPDKRYCGKTTSRKAWNE.DHWEQTLPGSSDEEISDEEG.SGDESEGLG...LEEYDED.DLGAEEQECCGD.HRE
Mm TRB 61 VSLLDTPDKRYSGKTTSRKAWKE.DHWEQALPSSSDNEASDEGG.SEDGDSEGLG...LEEISED.VDEDLEDNKISD.EGG
Xt AATF 58 ATLVDTPDKRYLGKATSRKDLQADF.....EGELSDSDS.DGDEAS...LDEELES...AGESDD.SEE
Dr AATF 60 AILADGDQRYRGKATSRKDLQDLGDSAD...EDDDNDGVDDEDES.GMLEKYMCMDDD.DDNDDDDDDDDD.DDD
Ce AATF 46 QNFNFEEGKYAGSAVSRKELFGDISEISG...LQGNFDKSESEDEEDE.EEK...IDNFDES...EPEIED.EEE
Dm AATF 66 KLLSEQSDRYKGISSRKELDDEKDD...EQEVSYES.DEDDEN...LTNFKQKLNAGGAEDESEETAAGH
At AATF 39 DGIEEDE.....VDSMEDDEGESEEDDE.GDT...EEDDEGD.SEEDEGENKEDDEDE
Sc Bfr2 71 KGLELNDPKYTGKVSQRQAL...YEEVSENEDE.EEEEE...EKEED.ALSFRTDSE...DEE

```

```

Hs AATF 136 SK.....KSR.SHSAKTPGFSVQSSISDF.EKFTKGMDDLGSSEEEED...EESGMEEGDDAEDSGESEEDRA.G
Mm TRB 135 SE.....DGSEGLGLEEFSE.....DVEEDLEGEDEEDRE.E
Xt AATF 113 ES.....GTDG...EEDLEVDSSQSLDEESDQEPADEDSSQKQDSS
Dr AATF 133 DDVEHQNDDEDLVGDGSSQMSLVSRLKMGTFD.MKLTGLDLDLGSDEDEETADSEE..EEGSEDEGSEE...
Ce AATF 110 NE.....DLEDE...EDENFEEIDTN...
Dm AATF 133 SE.....SGEESEIEENLTFKFKFEAGDFKYDDDEEEDDSEEDHSDQSEEGDD...DSEDDEAED
At AATF 88 SE.....DF.....EDGNKESSESG..DEGNDDNKDAQMEELEKEVK
Sc Bfr2 126 VE.....DEEE...SDADGGETEAAQQKRHALSK

```

### AATFD-N (N-terminal subdomain of AATF/Che1/Traube-superfamily domain)

```

Hs AATF 200 DRNSEDGVMVTFSSVKVSEVE.KGRAVKNQIALWDQLLEGRIKQLKALLTTNOLPQ.PDVFPPLF.KDKGGPEFSSALKN
Mm TRB 167 DRNSEDGVMVAAFSSVKVSEVE.KGRAVKNQIALWDQLLEGRIKQLKALLTTNOLPQ.PDVFPVVF.KDKGGPEFASALKN
Xt AATF 152 NSGLEDDGVLTFSEKVKSKDFE.KGQAIKNQIAIWDQLLEGRIKIQKALLLANOLPQ.SSAFETF.KKEGGTEFFKAQKN
Dr AATF 201 EMEEEESGLRTFSKVKVSEVE.KGRAVKNQIALWDLMLERRIKMQKALVTANOLPQ.PQTFSEF.KSRGGAEYADALKN
Ce AATF 128 .....MGMTTSLKDEEDKADKAASVRNQLVWDDLLYSNIRLHALLNTANOLPR.GEARKNL.LKTSEHTQKSMES
Dm AATF 194 DAIKPSPD...VMSKTNHQAETLQKGLAVQNQLRIWERLLELRINTQKFTSKANOLPA.PETLTKL.ASESD.ELQSVLNE
At AATF 123 ELRSQEQDILKLNK.RDKGEDAVKQAVKNQKALWDKILEFFRLLQKAFDRSNRLOPQ.EPVKSLFCEDEED..VSTAYTD
Sc Bfr2 153 LIQOETKQAINKLSQ.SVQRDAS.KGYSILOQTKLFDNIIDLRIKQLKQAVIAANLKLPLTTESWEEA.KMDDSEETKRLLKE

```

```

Hs AATF 278 SHKALKALLRSIVGLQEEELLFQYDPDRYLVDGTK...PNAGS.EEISSSEDD.E...LVVEE..KKQQR...V
Mm TRB 245 SHKALKALLRSIVLDQEEELLFQYDPDRHIVNGAK...PNTE.S.EEISSSEDD.E...LVGE..KKK.QRK...A
Xt AATF 230 NYKALKELMRSIVELQDELLYQFPETQYLIDGKK...CKSQSEDEISS.DE.ENE...VEED..TEKLRK...R
Dr AATF 279 SHKALKALQRSIVLELQDLLLLHQNKETRAISQKGTWDGSAKDDDEEINSEDDMD..ENEGDDQVEQKARN...G
Ce AATF 199 AMENM.GKLRNLMKNAMELIGEGKKAAGEDEED...DDVVEEIPS.DE.E...ILSD..FEDDEEPAEELEIP
Dm AATF 267 AQERSKSLQLLQSLLSQALHQYSEMKSVKRRQ...PT.....EDS...G
At AATF 199 LVTSSKKTLDLIVLELQALFEKNPSVDQVQVATA...SEESNKSDAEDS.D...
Sc Bfr2 231 NEKLFNNLFRNINFRIRKFLQGDHITQN...EEVAK...H

```

### coiled-coil

```

Hs AATF 338 PAKRKLKLEMED...YPSFMAKRFAFDFTVYRNTLQKWHDKTKL...ASGK...LGKGFGAFAER.SILTQIDHILMDKER
Mm TRB 304 PAKRKLKLEMED...YPSFMAKRFAFDFTIYRNTLQKWHDKTKL...ASGK...LGKGFGAFAER.SILTQIDHIMMDKER
Xt AATF 292 PAKRKLKLEVED...YPEFMEKRFAFRTYRNTLQKWHDKTKL...SGK...IGKGFGAFAER.SILTQIEQIMMDKER
Dr AATF 350 PAKRKLKLEMADE...YPNFMAKRFAAFQPYRDTTLQKWHDKTKL...TTGK...YNNKGFGAFAER.NILTOVEQVLMMDKER
Ce AATF 263 GKSRKIGGGTSVSKSLAKNLQKIDKMEKFRATTLTKWYNRTKILNTPKSM...NNTDPSVFEKGSILGQINKVLADEEK
Dm AATF 307 PAVKK...FGSVLQSNFQQMIGYRNEVLLKWDRTKLLTPGAGV...KRKSLQE.DY.DIIKKIGSALANREA
At AATF 246 ...LQKR...MSVFNKAVDKWQRKTQV...TTGAAAIKKG.LHAFNQ.NVSEQVASYMRDPSR
Sc Bfr2 265 KLSKRRSLKE...LYQETNSLDSEIKEYRTAVLNKWKSTKVSS...ASGNAALSSNKFKAINL.PADVQVENQLSDMSR

```

```

Hs AATF 406 LLRRRTQTKRSVYRVVLG.KPEPAAQVPESLP.....GEP.EILPQ...APANAHLKDL...EEIFDDDDFYH
Mm TRB 372 LLRRRTQTKRSAYRVVLG.KPEVPPEVAETLP.....GEP.ETLPQ...GPANAHLRDL...EEIFDDDDFYH
Xt AATF 359 LLKRTQTKRSFYRILG.KP.LDPSVPETV...NEAVDFQOE...GKSNSHLKDQD...EEMFDDDDFYH
Dr AATF 418 LVRRRTQTRSEYRVVLG.KPEPVTPEIDNTISE...GEVAELA...VKANMHLKDL...ENIFDDDDFYH
Ce AATF 340 LLKVRTNRSQKPRIG.GK...SDSPSELD...PETFDSDFYH
Dm AATF 372 LVEKSTQPKNSQAE...QOENTPVQRL...KHIDYSDFYH
At AATF 306 MIKMQQSRSTVAVFGTVPQEAEPNPEEKQ...EEGD...PELVEAEFYR
Sc Bfr2 336 LMKRRTKLNRRNITPLFYQKDCANGRLPELISPVVKDSVDDNNSDDGLDIPKNYDPRKRDNNAIDITENPYVFDDEEYR

```

### AATFD-C (C-terminal subdomain of AATF/Che1/Traube-superfamily domain)

```

Hs AATF 466 QLLRELIERTSSLDPN.DQVAMGRQWLAIQKLRSLKIKHKVDRKASKGRKLRHFVLSKLLSFMAPIDH.TTMNDDARTE
Mm TRB 432 QLLRELIERTSSLDPN.DQVAMGRQWLAIQKLRSLKIRKKVDRKASKGRKLRHFVLSKLLSFMAPIDH.TAMSDARTE
Xt AATF 419 QLLREVIERTSSLDPN.DQVAMGRQWLAIQKLRSLKIKKKVDTKASKGRKIRYHVHVKSLVSMAPIDH.STMNDDARTE
Dr AATF 478 QLLRELIERTSATDPN.DQVAMGKQWLAIQKLRSLKIKKKVDTKASKGRKIRYHVHVKSLMFMAMPDN.SSMSDDARSE
Ce AATF 377 ILLKQMLEARNQMSNNSQDGDAMTRSVMELQTMFSNKKRSDVSQLSSKDRRLKYPIARLINFYPSKPSVVTWSHARNE
Dm AATF 407 QQLRELIERYKASTSS...NMSEITKQFVELQKLRQ.KMKKKVDTRASKGRKLRVYVHVKLINFMAPNES.SDWTDAKSE
At AATF 352 QLLKEFLE...TI...DPASSEAAFYEMKFFQT.KRKKVDRRASGRKIRYVHVKLIVNFMAPRA...KIPNTAD
Sc Bfr2 416 VLLNDLIDKKSNAHNS.ESAAITITSTNARSNN...KLLKNIDTKASKGRKLNYSVQDPIANIYEAPITSGYKWSDDQIDE

```

```

Hs AATF 543 LYRSIFGQLHPPDEGHGD.....
Mm TRB 509 LFRSIFGQLNPPDADRQK.....
Xt AATF 496 LYQSIFGKTKCQDEEKQV.....
Dr AATF 555 LFRSIFANGPVTTQ.....
Ce AATF 457 LFKSIFS.....
Dm AATF 482 LYKSEFV.....
At AATF 420 LLKNIIFGLKTRNVQSEA.....
Sc Bfr2 493 FFAGLIGQRVNFNENEDEEQHARIENDEELEVKNDDIQIFG

```

**Figure S2: AATF is conserved in eukaryotes.**

Alignment of AATF orthologs generated using MUSCLE (1). The two conserved subdomains as annotated in Pfam are marked by a dark and light green line, respectively. Predicted NLS sequences of each ortholog are shown in red. A predicted coiled-coil helix is highlighted with a grey line. Residues that are fully conserved are marked with dark green boxes, while residues with more than 70% similarity between orthologs are indicated with light green. Species are abbreviated as follows: *Homo sapiens* (Hs), *Mus musculus* (Mm), *Xenopus tropicalis* (Xt), *Danio rerio* (Dr), *Caenorhabditis elegans* (Ce), *Drosophila melanogaster* (Dm), *Arabidopsis thaliana* (At), *Saccharomyces cerevisiae* (Sc).

### Supplementary Figure 3

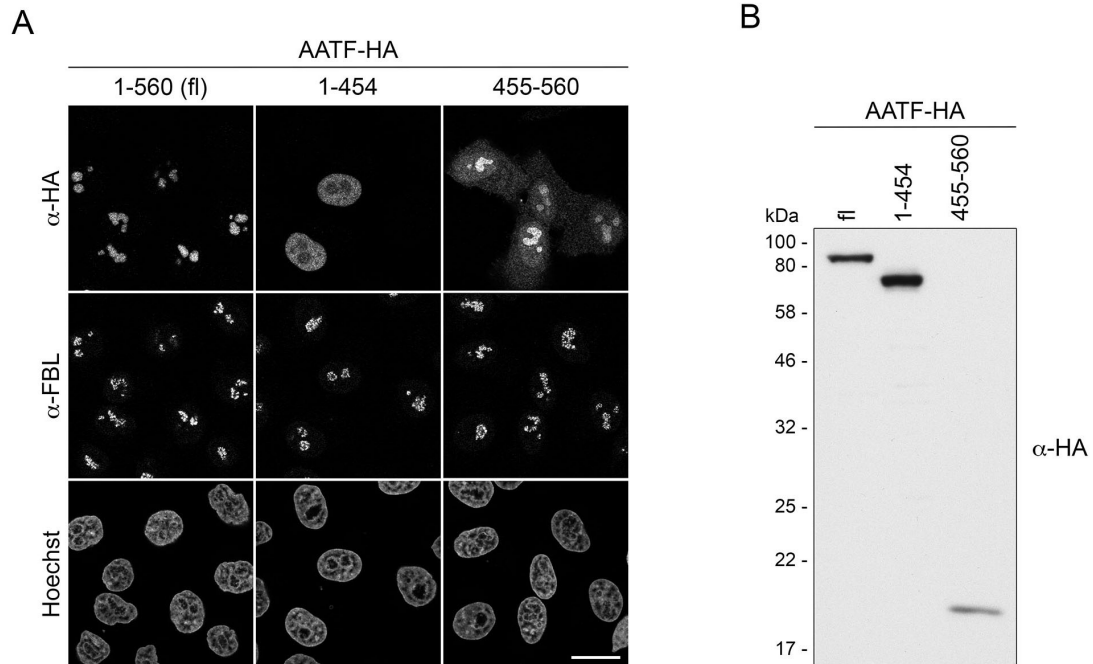

#### Figure S3: Localization and expression levels of AATF constructs.

(A) HeLa cells were transiently transfected with constructs encoding for HA-tagged full-length (fl) AATF, AATF(1-454) or AATF(455-560). After 48 h, localization of AATF-derivatives was analyzed by IF using an anti-HA antibody and compared to FBL localization. Nuclei were stained with Hoechst. Scale bar, 20  $\mu$ m.

(B) AATF constructs were expressed as in (A). Protein levels and integrity were examined by immunoblotting.

## Supplementary Figure 4

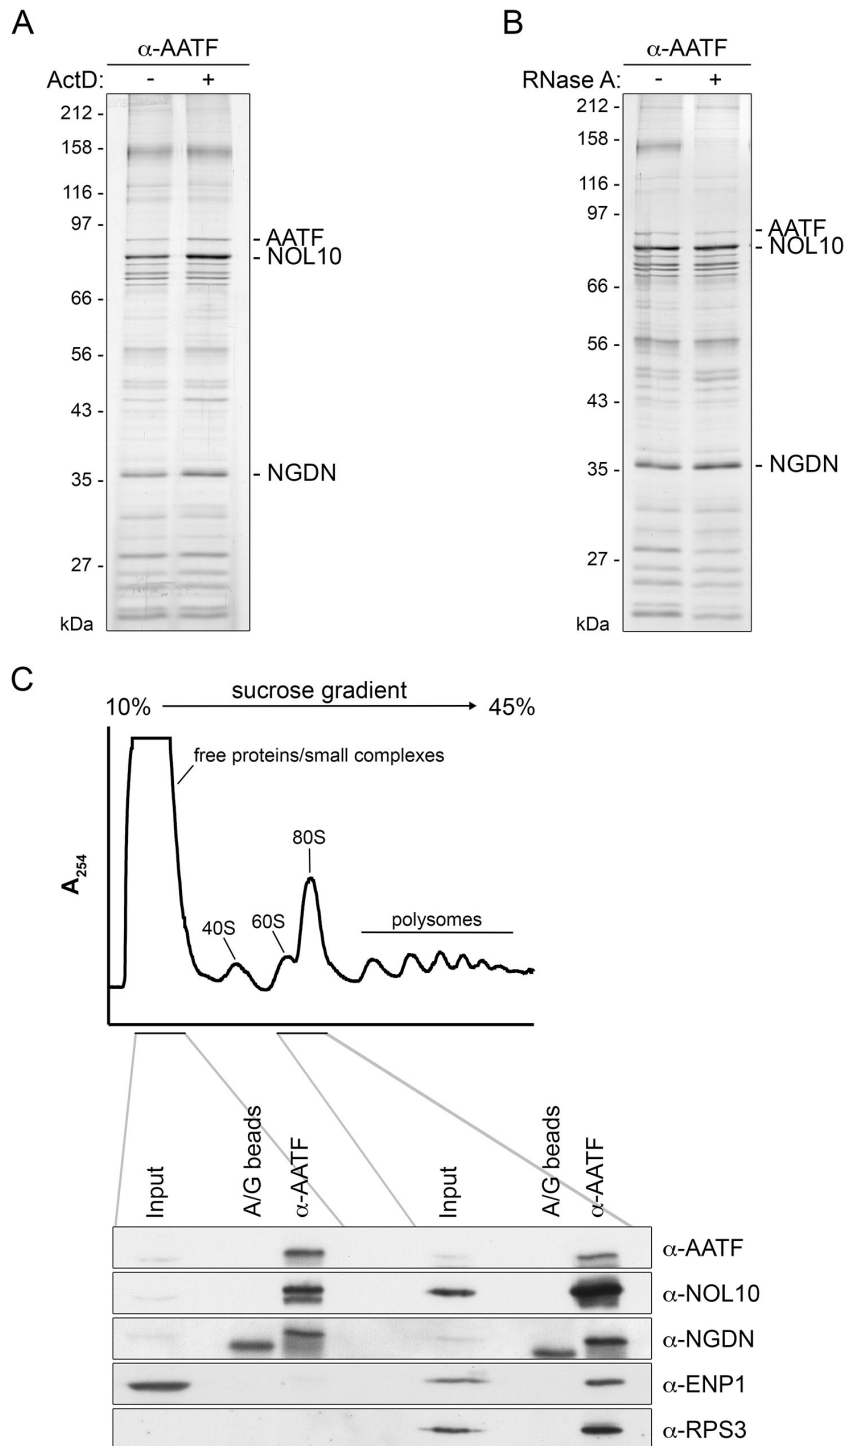

### Figure S4: The ANN complex is resistant to actinomycin D and RNase A treatment.

(A) Purification of AATF from HeLa cells by IP after incubating the cells with actinomycin D (ActD, 2  $\mu$ M, 37°C) for 2.5 h or (B) incubating the cell extract with RNase A (100  $\mu$ g/ml, 4°C) for 30 min. Isolated proteins were analyzed by SDS-PAGE, followed by silver staining. Members of the ANN complex are marked next to the gels. Note that the activities of ActD and of RNase A were controlled by pre-rRNA FISH and analysis of RNA digestion in the extract, respectively (data not shown).

(C) Sucrose gradient analysis performed as in Figure 3D, except that the centrifugation was done using an SW41 rotor at 32'000 rpm for 3 h 45 min. Gradients were analyzed with a Foxy Jr. gradient collector at OD<sub>254</sub>. Fractions containing either free proteins/small complexes or 60S/80S particles were pooled and used as separate inputs for AATF IPs. A/G beads without antibody were used as a negative control. The indicated proteins were detected in the inputs and eluates by immunoblotting. Note that the anti-NGDN antibody recognizes an unspecific band running below the NGDN protein in the A/G beads negative control.

## Supplementary Figure 5

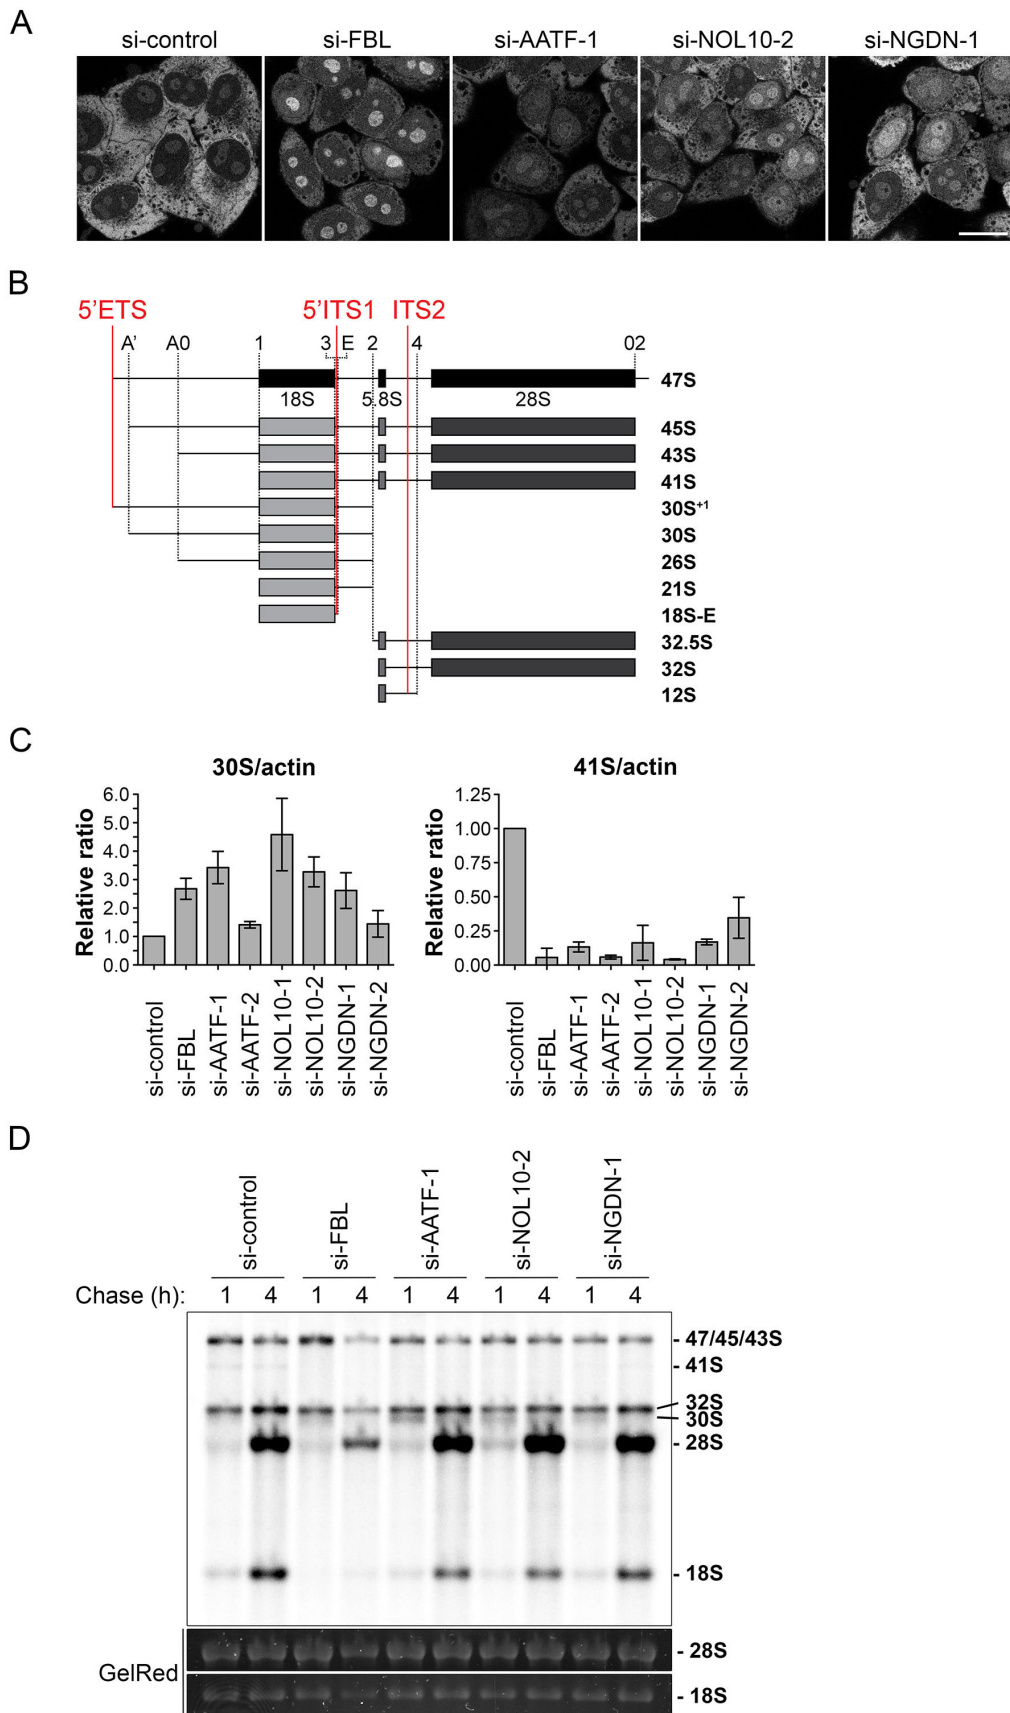

**Figure S5: The ANN complex supports pre-18S rRNA processing.**

(A) Indicated proteins were depleted by RNAi for 48 h in RPS2-YFP expressing HeLa cells as in Figure 1. Cells were analyzed by confocal microscopy. Scale bar, 20  $\mu$ m.

(B) Schematic representation of major rRNA precursors in human cells, including endonucleolytic cleavage sites (dashed lines) (2). The binding sites for the 5'ETS, 5'ITS1 and ITS2 probes are indicated (red lines). Each probe recognizes a specific subset of rRNA precursors.

(C) Quantification of three independent experiments as shown in Figure 8B. Mean  $\pm$  SD (error bars).

(D) Pulse-labeling experiment performed as in Figure 8E. RNAi-induced depletion of the indicated proteins was for 48 h. Levels of newly synthesized 18S and 28S rRNA after a chase period of 4 h were quantified from three independent experiments and are depicted in Figure 8F.

**REFERENCES**

1. Edgar,R.C. (2004) MUSCLE: multiple sequence alignment with high accuracy and high throughput. *Nucleic Acids Research*, **32**, 1792–1797.
2. Henras,A.K., Plisson-Chastang,C., O'Donohue,M.-F., Chakraborty,A. and Gleizes,P.-E. (2015) An overview of pre-ribosomal RNA processing in eukaryotes. *WIREs RNA*, **6**, 225–242.



## Supplementary Table 1

| Band    | Gene name | Unique peptides [#] | Sequence coverage [%] | Gene ID | Molecular weight [kDa] |
|---------|-----------|---------------------|-----------------------|---------|------------------------|
| 1       | THRAP3    | 41                  | 34                    | 9967    | 109 kDa                |
|         | PPP1R12A  | 14                  | 14                    | 4659    | 115 kDa                |
| 2       | MATR3     | 21                  | 23                    | 9782    | 95 kDa                 |
|         | NAT10     | 18                  | 17                    | 55226   | 116 kDa                |
|         | HNRNPU    | 11                  | 11                    | 3192    | 89 kDa                 |
| 3       | PPP1R13L  | 29                  | 37                    | 10848   | 89 kDa                 |
|         | PML       | 14                  | 14                    | 5371    | 98 kDa                 |
|         | HNRNPUL2  | 13                  | 17                    | 221092  | 85 kDa                 |
| 4       | AATF      | 13                  | 20                    | 26574   | 63 kDa                 |
| 5       | NOL10     | 26                  | 31                    | 79954   | 80 kDa                 |
|         | HSPA5     | 18                  | 30                    | 3309    | 72 kDa                 |
|         | DDX3X     | 8                   | 12                    | 1654    | 73 kDa                 |
|         | SLC30A1   | 7                   | 14                    | 7779    | 55 kDa                 |
| 6       | YBX1      | 10                  | 34                    | 4904    | 40 kDa                 |
|         | RPL4      | 9                   | 18                    | 6124    | 53 kDa                 |
|         | SEPT7     | 4                   | 16                    | 989     | 51 kDa                 |
| 7       | EIF4A3    | 15                  | 29                    | 9775    | 47 kDa                 |
|         | RPL3      | 14                  | 27                    | 6122    | 49 kDa                 |
|         | ACTB      | 11                  | 30                    | 60      | 41 kDa                 |
|         | WDR18     | 7                   | 15                    | 57418   | 49 kDa                 |
|         | PAK1IP1   | 6                   | 14                    | 55003   | 44 kDa                 |
| 8       | NGDN      | 15                  | 43                    | 25983   | 36 kDa                 |
|         | ANXA2     | 8                   | 23                    | 302     | 39 kDa                 |
|         | RPL5      | 6                   | 21                    | 6125    | 34 kDa                 |
|         | CENPV     | 6                   | 28                    | 201161  | 30 kDa                 |
|         | RPLP0     | 5                   | 17                    | 6175    | 31 kDa                 |
|         | PPP1CA    | 5                   | 14                    | 5499    | 39 kDa                 |
|         | RPL6      | 4                   | 14                    | 6128    | 33 kDa                 |
| 9       | PGAM5     | 9                   | 27                    | 192111  | 32 kDa                 |
|         | RPS3A     | 7                   | 26                    | 6189    | 30 kDa                 |
|         | GNB2L1    | 7                   | 17                    | 10399   | 43 kDa                 |
|         | HIST1H1E  | 2                   | 11                    | 3008    | 22 kDa                 |
| 10      | FHL2      | 15                  | 46                    | 2274    | 32 kDa                 |
|         | RPL8      | 12                  | 29                    | 6132    | 28 kDa                 |
|         | RPS3      | 12                  | 43                    | 6188    | 27 kDa                 |
|         | RPS6      | 11                  | 33                    | 6194    | 29 kDa                 |
|         | RPL7A     | 10                  | 31                    | 6130    | 30 kDa                 |
|         | RPS4X     | 8                   | 17                    | 6191    | 43 kDa                 |
|         | SLC25A5   | 8                   | 24                    | 292     | 33 kDa                 |
|         | RPS2      | 7                   | 23                    | 6187    | 31 kDa                 |
|         | RPL7      | 6                   | 24                    | 6129    | 29 kDa                 |
|         | NSA2      | 4                   | 16                    | 10412   | 30 kDa                 |
|         | FHL3      | 3                   | 10                    | 2275    | 31 kDa                 |
| SLC25A3 | 3         | 11                  | 5250                  | 26 kDa  |                        |
| 11      | RPL13     | 9                   | 41                    | 6137    | 24 kDa                 |
|         | RPS8      | 5                   | 23                    | 6202    | 27 kDa                 |
|         | MRPL24    | 5                   | 18                    | 79590   | 25 kDa                 |
|         | HSPB1     | 2                   | 10                    | 3315    | 23 kDa                 |
| 12      | RPL19     | 9                   | 31                    | 6143    | 26 kDa                 |
|         | PCMT1     | 8                   | 28                    | 5110    | 25 kDa                 |
|         | POLR2E    | 4                   | 20                    | 5434    | 25 kDa                 |
|         | RPL14     | 3                   | 17                    | 9045    | 24 kDa                 |
|         | MRPS34    | 3                   | 13                    | 65993   | 26 kDa                 |
| 13      | RPL10     | 11                  | 41                    | 6134    | 25 kDa                 |
|         | RPL13A    | 9                   | 35                    | 23521   | 23 kDa                 |
|         | MAD2L1    | 5                   | 21                    | 4085    | 24 kDa                 |
|         | RPL15     | 4                   | 15                    | 6138    | 24 kDa                 |

|           |        |    |    |       |        |
|-----------|--------|----|----|-------|--------|
| <b>14</b> | RPS9   | 17 | 58 | 6203  | 23 kDa |
|           | RPS5   | 4  | 13 | 6193  | 23 kDa |
|           | RPL18  | 2  | 11 | 6141  | 19 kDa |
| <b>15</b> | RPL17  | 10 | 42 | 6139  | 21 kDa |
|           | RPL18A | 5  | 26 | 6142  | 21 kDa |
|           | MRPL47 | 4  | 16 | 57129 | 27 kDa |
|           | CAV1   | 3  | 15 | 857   | 20 kDa |

**Supplementary Table 1**

MS analysis of the AATF immunoprecipitation. All proteins that have been identified with at least 2 peptides and a sequence coverage of  $\geq 10\%$  are listed. The band numbers correspond to the labeling in Figure 3A.
